# Supplementary material
Source: publisher figshare collection journal article supplement (https://geolsoc.figshare.com/ndownloader/files/14312867)
Supplement: Supplementary file 1 [file 14312867]

## Sheet: Sheet1
Table S3 Patuki Melange ch. 7 Croisilles area XRF
Sample name	NZ13-359	NZ13-360	NZ13-361	NZ13-363	NZ13-377	NZ13-380	NZ13-382
Rock type	basalt	basalt	basalt	basalt	basalt	Basalt	b
Region	road by Goat Hill	road by Goat Hill	road by Goat Hill	road by Goat Hill	McLaren Bay	McLaren Bay	Elaine Bay area
GPS	S41 10872 E173 62978	S41 10724 E173 63553	S41 10724 E173 63553	S41 11212 E173 64235	S41 07114 E17370387	S41 06962 E173 70984	S41 06252 E173 75464
Major Elements
SiO2	47.8581	47.7124	48.9636	45.5566	50.8674	51.9651	49.0346
Al2O3	13.8891	13.7158	11.845	15.1554	12.1992	14.7906	13.2153
Fe2O3	13.5273	13.9178	15.0829	13.4167	8.9658	11.4939	13.8243
MgO	5.15565	4.9086	6.32345	5.13555	8.7414	5.0985	6.77005
CaO	10.2007	10.6252	7.5719	10.0902	11.016	6.3459	7.72415
Na2O	3.1356	3.2522	3.4916	2.1105	1.7544	5.1282	3.98895
K2O	0.24321	0.07171	0.07511	1.1658	2.03898	0.4455	0.13601
TiO2	2.21803	2.05333	2.90087	2.02407	1.02612	1.54737	2.09191
MnO	0.21105	0.19291	0.20097	0.22914	0.17952	0.19998	0.24157
P2O5	0.214065	0.20402	0.260855	0.185925	0.07038	0.13563	0.177625
LOI	2.95	3.11	2.86	4.53	2.52	2.34	2.82
Total	99.6029	99.764	99.5763	99.6	99.3792	99.4907	100.025
Trace Elements
Zn	128.9	143.1	167.8	116.7	154.7	127.7	114.3
Cu	48.6	48.9	41.5	81.6	28.9	54.4	60.2
Ni	88.3	61.8	73.7	79.3	54.8	62.7	58
Cr	207.2	143.5	171.6	218.3	123.4	152	158
V	475.8	502.1	396.7	369.6	493.2	419	432.8
Ba	26.9	22.6	95.4	268.5	64.7	201.5	234.5
Sc	57	56.4	60.5	54.8	51	48.6	50.8
La	1.8	3.3	-0.3	3.4	3.3	1.2	2.7
Ce	15.6	21.2	12.8	11	19.1	15.4	15.7
Nd	15.1	20.7	12.3	9.5	14.7	11	13.9
U	-1.3	-0.7	0.4	0.7	-1.9	0.8	0.6
Th	-0.1	0	0.1	0.3	0.1	0	-0.4
Pb	1	0.9	0.6	1.7	1.9	0.9	0.8
Nb	2.7	4.6	3.3	6.3	3.5	3.9	4
Zr	132.2	197.4	125.5	91.5	120.2	133.3	134.5
Y	48	64.9	49.4	35.9	56.5	46.4	47.9
Sr	88.1	122.3	103.8	394.9	191.1	147.7	132.7
Rb	2.3	0.6	39.8	55.5	-0.1	5.2	5.1
